# Supplementary material
Source: PubMed Central journal article supplement (PMC3457294)
Supplement: JVI.01428-12_zjv999096634so3.pdf [file JVI.01428-12_zjv999096634so3.pdf]

## Supplemental Movie Legends

**Movie S1: Ad5 membrane rupture occurring near the cell surface.** U2OS cells stably expressing mCherry-Gal3 were asynchronously infected with fluorescently labeled Ad5. 15 minutes post infection, cells were imaged using a Leica spinning disc DM6000 confocal microscope with heated stage, dual band pass 488/561nm excitation filter and Evolve CCD camera at a time resolution of 200 msec. Scale bar is 2  $\mu\text{m}$ .

**Movie S2: Ad5 escape from gal3+ endosomes.** U2OS cells stably expressing mCherry-Gal3 were asynchronously infected with fluorescently labeled Ad5. 30 minutes post-infection, cells were imaged using a Leica spinning disc DM6000 confocal microscope with heated stage, dual band pass 488/561nm excitation filter and Evolve CCD camera at a time resolution of 200 msec. Scale bar is 10  $\mu\text{m}$ .
